# Supplementary material for: Meningeal lymphatics regulate radiotherapy efficacy through modulating anti-tumor immunity
Source: PubMed Central journal article supplement (PMC9159979; doi:10.1038/s41422-022-00639-5), 2022-03-17
Supplement: 41422_2022_639_MOESM2_ESM.pdf [file 41422_2022_639_MOESM2_ESM.pdf]

### Supplementary information, Figure S2

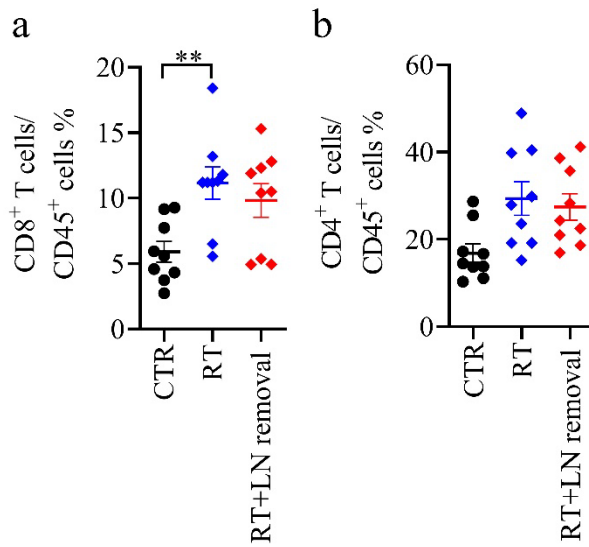

### Supplementary information, Figure S2. T cell population in LN removal model.

CD8<sup>+</sup> T cells (a), and CD4<sup>+</sup> T cells (b) in in tumors from CTR, RT, and RT+LN removal groups as percentages of overall CD45<sup>+</sup> cells on day 22 after inoculation (n = 9). Data are presented as means ± SEM. \*\*P < 0.01; one-way ANOVA (a–b). Data are from at least three (a–b) independent experiments.
