# Supplementary material for: Meningeal lymphatics regulate radiotherapy efficacy through modulating anti-tumor immunity
Source: PubMed Central journal article supplement (PMC9159979; doi:10.1038/s41422-022-00639-5), 2022-03-17
Supplement: 41422_2022_639_MOESM3_ESM.pdf [file 41422_2022_639_MOESM3_ESM.pdf]

**Supplementary information, Figure S3**

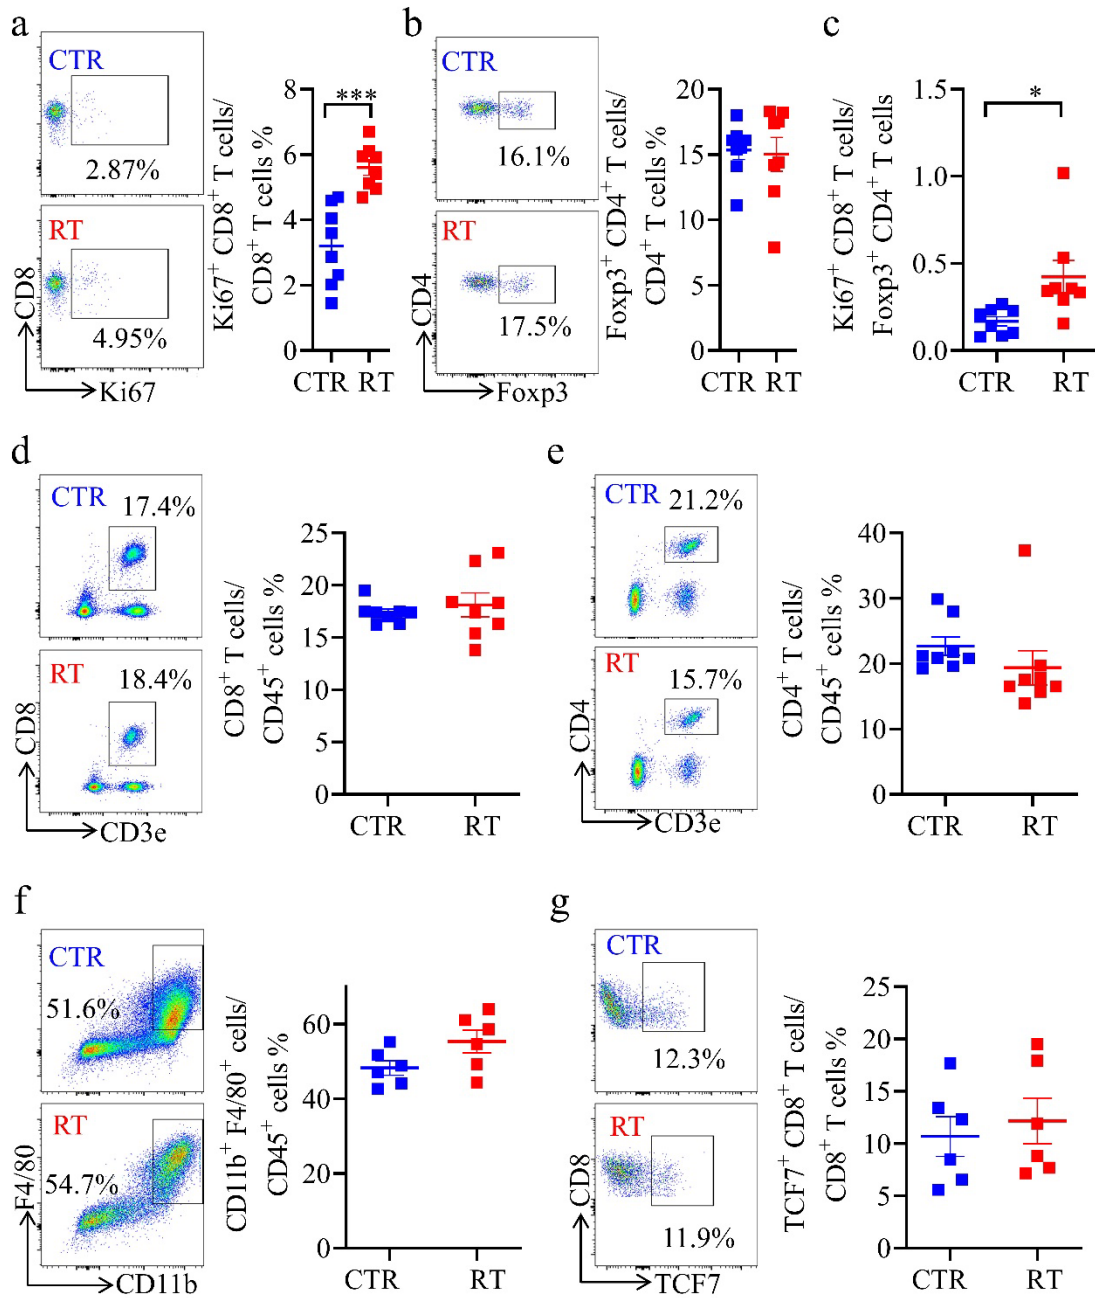

**Supplementary information, Figure S3. RT promotes anti-tumor immunity.**

Representative flow cytometry plots and quantification of CD8<sup>+</sup> Ki67<sup>+</sup> T cells as percentages of overall CD8<sup>+</sup> T cells (a), and CD4<sup>+</sup> Foxp3<sup>+</sup> T cells as percentages of overall CD4<sup>+</sup> T cells (b) in CLNs from GL261 tumor mice with or without RT on day 22 after inoculation (n = 8). c, Ratios of CD8<sup>+</sup> Ki67<sup>+</sup> T cells to CD4<sup>+</sup> Foxp3<sup>+</sup> T cells in CLNs from GL261 tumor mice with or without RT (n = 8). d–e, Representative flow cytometry plots and quantification of CD8<sup>+</sup> T cells (d), and CD4<sup>+</sup> T cells (e) in CLNs

from GL261 tumor mice with or without RT as percentages of overall CD45<sup>+</sup> cells on day 22 after inoculation (n = 8). f, Representative flow cytometry plots and quantification of CD11b<sup>+</sup> F4/80<sup>+</sup> cells in tumors from GL261 tumor mice with or without RT as percentages of overall CD45<sup>+</sup> cells on day 22 after inoculation (n = 6). g, Representative flow cytometry plots and quantification of CD8<sup>+</sup> TCF7<sup>+</sup> T cells in tumors from GL261 tumor mice with or without RT as percentages of overall CD45<sup>+</sup> cells on day 22 after inoculation (n = 6). Data are presented as means ± SEM. \*P <0.05, \*\*\*P <0.001; Student's t test (a–g). Data are from at least three (a–g) independent experiments.
