# Supplementary material for: Meningeal lymphatics regulate radiotherapy efficacy through modulating anti-tumor immunity
Source: PubMed Central journal article supplement (PMC9159979; doi:10.1038/s41422-022-00639-5), 2022-03-17
Supplement: 41422_2022_639_MOESM7_ESM.pdf [file 41422_2022_639_MOESM7_ESM.pdf]

**Supplementary information, Figure S7**

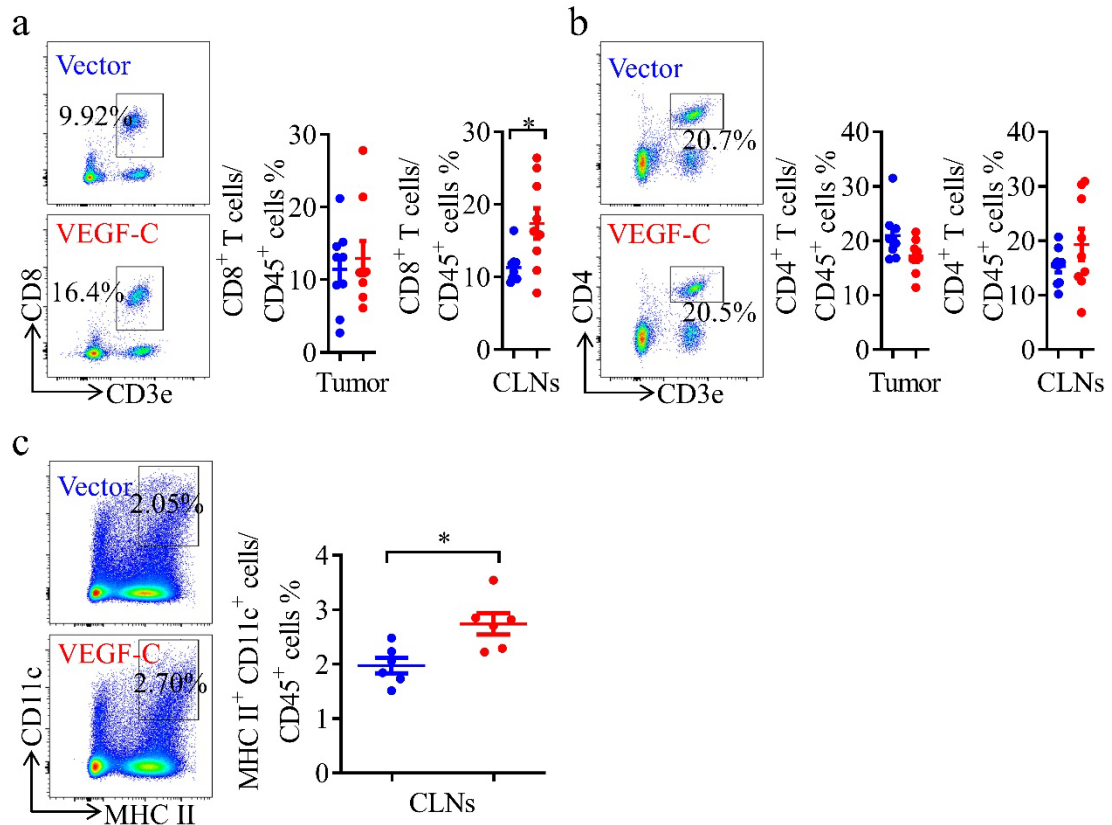

**Supplementary information, Figure S7. T cell and DC population in VEGF-C-overexpressing gliomas.** a–b, Representative flow cytometry plots of CD8<sup>+</sup> T cells (a), and CD4<sup>+</sup> T cells (b) in CLNs (left) and quantification (right) in tumors and CLNs from mice with striatal Vector-GL261 or VEGF-C-GL261 tumor injection treated with RT as percentages of overall CD45<sup>+</sup> cells on day 22 after inoculation (n = 9). c, Representative flow cytometry plots and quantification of CD11c<sup>+</sup> MHCII<sup>+</sup> cells in CLNs from mice with striatal Vector-GL261 or VEGF-C-GL261 tumor injection treated with RT as percentages of overall CD45<sup>+</sup> cells on day 22 after inoculation (n = 6). Data are presented as means ± SEM. \*P < 0.05; Student's t test (a–c). Data are from at least three (a–c) independent experiments.
