# Supplementary material for: Meningeal lymphatics regulate radiotherapy efficacy through modulating anti-tumor immunity
Source: PubMed Central journal article supplement (PMC9159979; doi:10.1038/s41422-022-00639-5), 2022-03-17
Supplement: 41422_2022_639_MOESM8_ESM.pdf [file 41422_2022_639_MOESM8_ESM.pdf]

**Supplementary information, Figure S8**

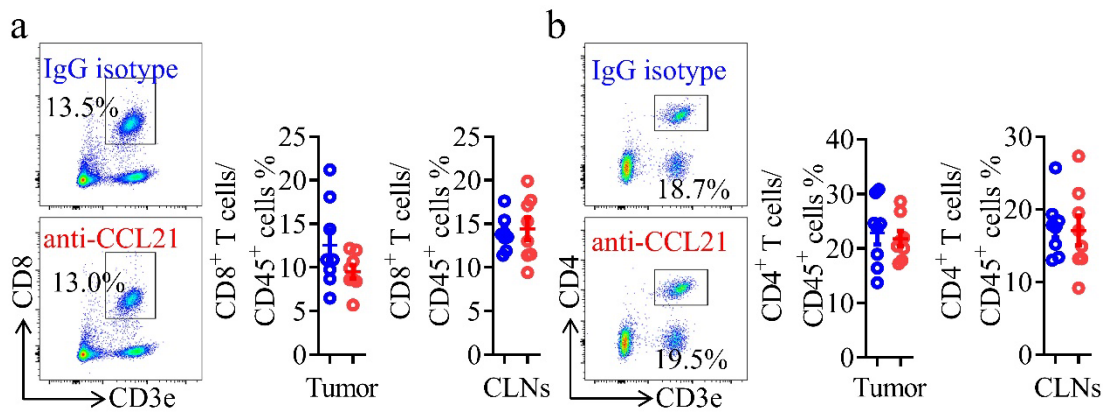

**Supplementary information, Figure S8. T cell population after CCL21 blockade.**

a–b, Representative flow cytometry plots of CD8<sup>+</sup> T cells (a), and CD4<sup>+</sup> T cells (b) in CLNs (left) and quantification (right) in tumors and CLNs from IgG isotype or anti-CCL21 groups as percentages of overall CD45<sup>+</sup> cells on day 22 after inoculation (n = 8). Data are presented as means ± SEM. Student's t test (a–b). Data are from at least three (a–b) independent experiments.
