# Supplementary material for: Meningeal lymphatics regulate radiotherapy efficacy through modulating anti-tumor immunity
Source: PubMed Central journal article supplement (PMC9159979; doi:10.1038/s41422-022-00639-5), 2022-03-17
Supplement: 41422_2022_639_MOESM9_ESM.pdf [file 41422_2022_639_MOESM9_ESM.pdf]

Supplementary information, Figure S9

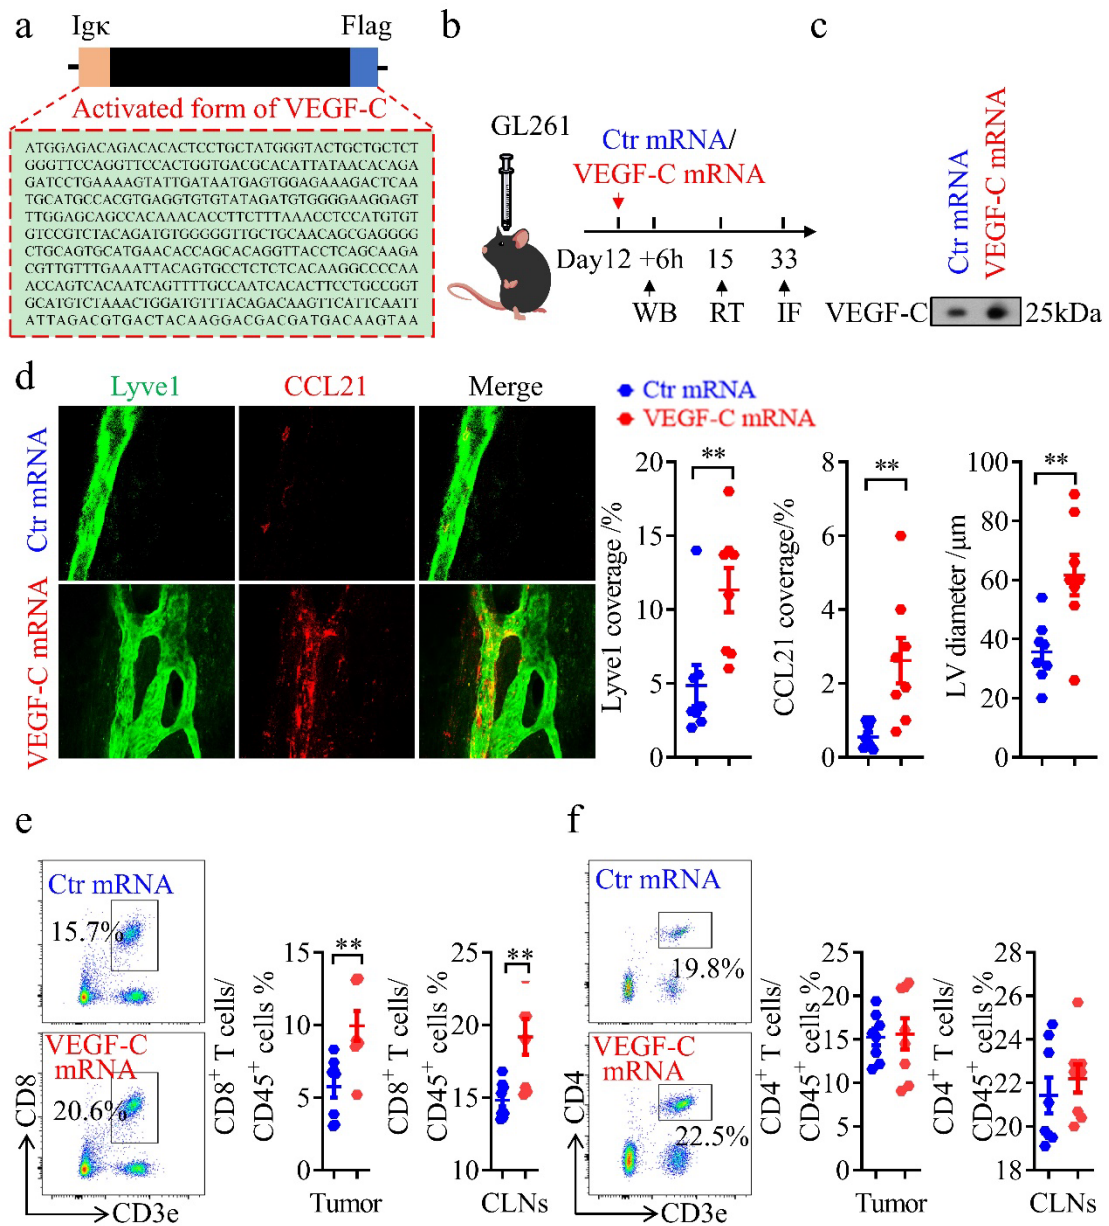

**Supplementary information, Figure S9. VEGF-C mRNA induces VEGF-C overexpression.** a, Construction of Ig $\kappa$ -VEGF-C-flag mRNA. b, Monitoring and treatment scheme. Control (Ctr) mRNA or VEGF-C mRNA was injected on day 12 after inoculation. c, Immunoprecipitation of secreted VEGF-C protein in cerebrospinal fluid 6 h after mRNA injection. d, Left panels, Lyve1 and CCL21 staining of MLVs in mice treated with Ctr mRNA or VEGF-C mRNA, 21 days after mRNA injection. Right panels, quantification of the percentage area of Lyve1 or CCL21, and the LV diameter (n = 8). e–f, Representative flow cytometry plots of CD8<sup>+</sup> T cells (e), and CD4<sup>+</sup> T cells

(f) in CLNs (left) and quantification (right) in tumors and CLNs from Ctr mRNA or VEGF-C mRNA groups as percentages of overall CD45<sup>+</sup> cells on day 22 after inoculation (n = 8). Data are presented as means  $\pm$  SEM. \*\*P < 0.01; Student's t test (d–f). Data are from at least two (c–f) independent experiments.
