# Supplementary material for: Meningeal lymphatics regulate radiotherapy efficacy through modulating anti-tumor immunity
Source: PubMed Central journal article supplement (PMC9159979; doi:10.1038/s41422-022-00639-5), 2022-03-17
Supplement: 41422_2022_639_MOESM12_ESM.pdf [file 41422_2022_639_MOESM12_ESM.pdf]

Supplementary information, Figure S12

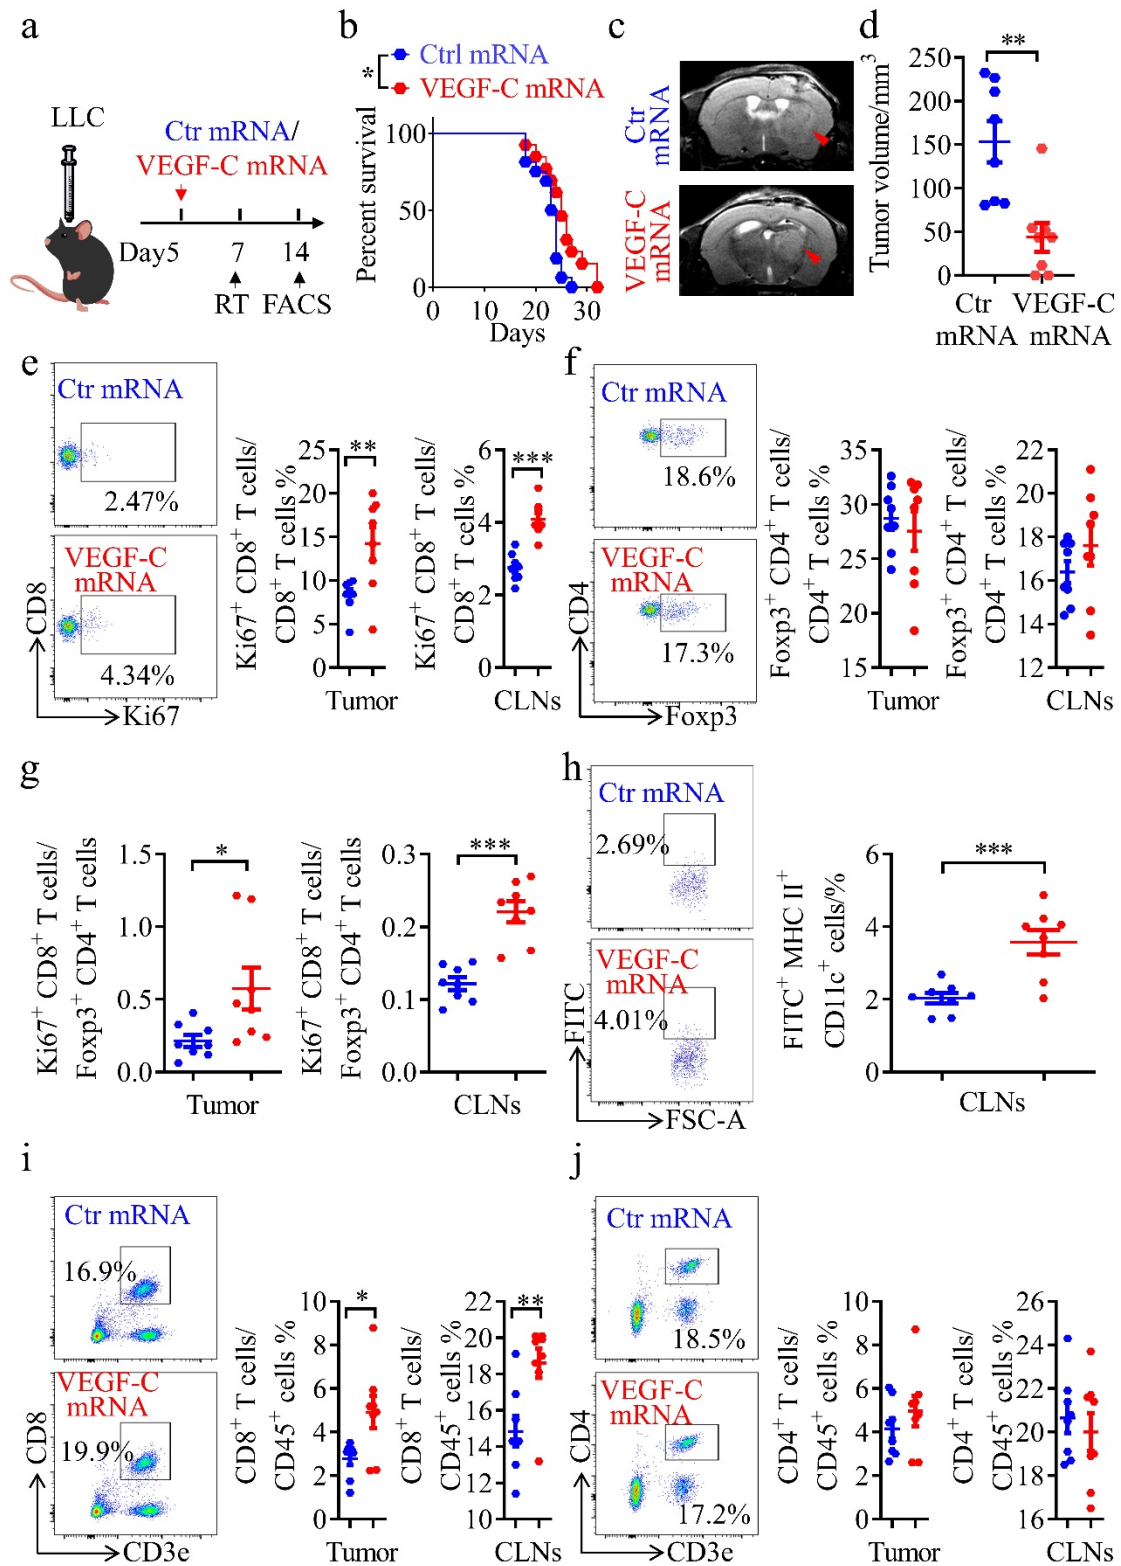

Supplementary information, Figure S12. VEGF-C mRNA also enhances the efficiency of RT in a model of metastatic lung cancer. a, Monitoring and treatment scheme. mRNA was injected on day 5 after inoculation. b, Survival of mice with

striatal LLC tumor injection treated with RT, and with or without VEGF-C mRNA (Ctr mRNA, n = 13; VEGF-C mRNA, n = 16). c, Representative T2-weighted single brain slices of mice from Ctr mRNA or VEGF-C mRNA groups (triangles indicate tumors). d, Tumor volume in mice from Ctr mRNA or VEGF-C mRNA groups (n = 8). e–f, Representative flow cytometry plots of CD8<sup>+</sup> Ki67<sup>+</sup> T cells as percentages of overall CD8<sup>+</sup> T cells (e), and CD4<sup>+</sup> Foxp3<sup>+</sup> T cells as percentages of overall CD4<sup>+</sup> T cells (f) in CLNs (left) and quantification (right) in tumors and CLNs from Ctr mRNA or VEGF-C mRNA groups on day 14 after inoculation (n = 8). g, Ratios of CD8<sup>+</sup> Ki67<sup>+</sup> T cells to CD4<sup>+</sup> Foxp3<sup>+</sup> T cells in tumors and CLNs from Ctr mRNA or VEGF-C mRNA groups (n = 8). h, Left panel, representative flow cytometry dot plots of DC trafficking from LLC tumors to CLNs of mice in the above groups by the quantity of CD11c<sup>+</sup> MHCII<sup>+</sup> FITC<sup>+</sup> cells in the CLNs 24 h after intratumoral injection of FITC-labeled latex beads. Right panel, quantification of FITC<sup>+</sup> DCs in the CLNs of the Ctr mRNA or VEGF-C mRNA groups (n = 8). i–j, Representative flow cytometry plots of CD8<sup>+</sup> T cells (i), and CD4<sup>+</sup> T cells (j) in CLNs (left) and quantification (right) in tumors and CLNs from Ctr mRNA or VEGF-C mRNA groups as percentages of overall CD45<sup>+</sup> cells on day 14 after inoculation (n = 8). Data are presented as means ± SEM. \*P < 0.05, \*\*P < 0.01, \*\*\*P < 0.001; log-rank (Mantel–Cox) test (b); Student's t test (d–j). Data are from at least three (b, e–j) or two (c, d) independent experiments.
