# Supplementary material for: Meningeal lymphatics regulate radiotherapy efficacy through modulating anti-tumor immunity
Source: Cell Res. 2022 Mar 17;32(6):543–54. doi: 10.1038/s41422-022-00639-5 (PMC9159979; doi:10.1038/s41422-022-00639-5)
Supplement: Supplementary file 1 — Supplementary information, Fig. S1 [file 41422_2022_639_MOESM1_ESM.pdf]

# Supplementary information, Figure S1

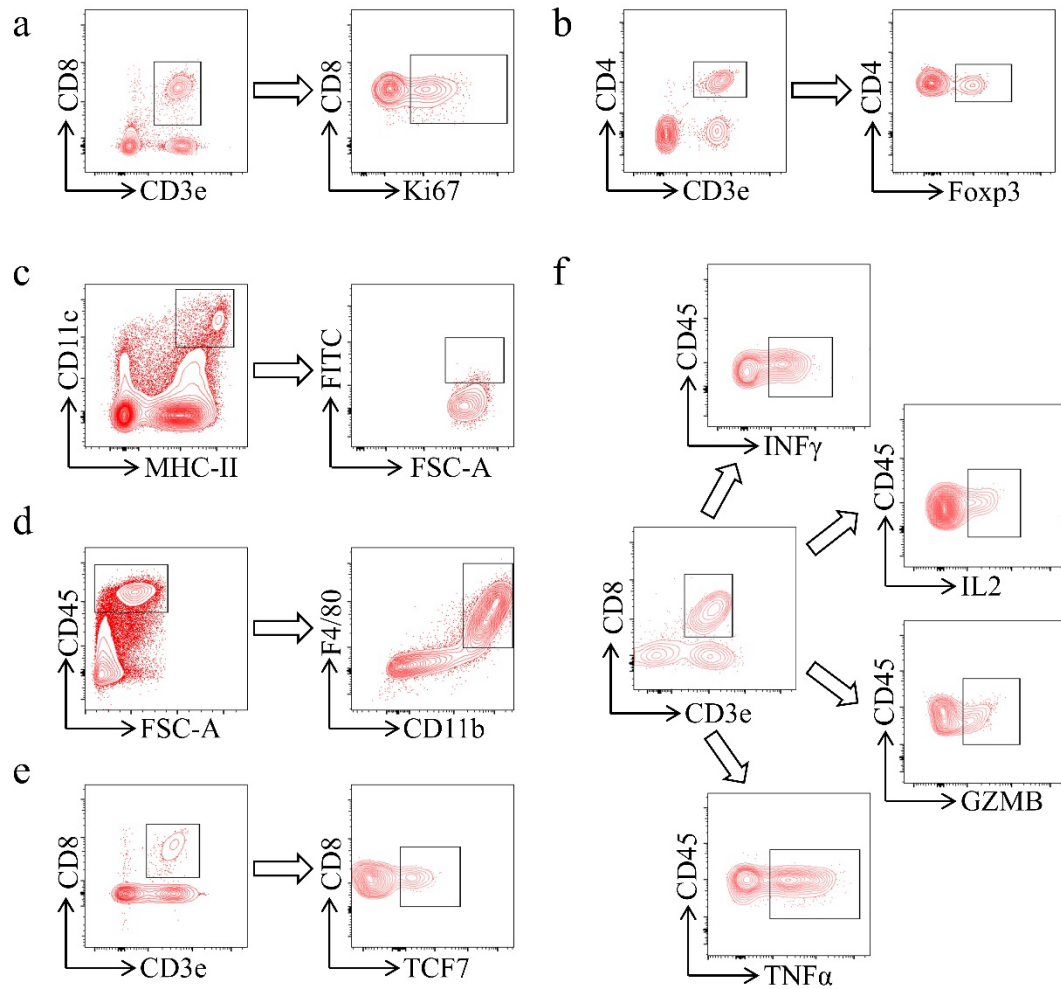

**Supplementary information, Figure S1. Flow cytometry gating strategies.** Representative contour plots for CD8<sup>+</sup> Ki67<sup>+</sup> T cells (a), CD4<sup>+</sup> Foxp3<sup>+</sup> T cells (b), CD11c<sup>+</sup> MHCII<sup>+</sup> FITC<sup>+</sup> cells (c; Beads<sup>+</sup> DCs), CD11b<sup>+</sup> F4/80<sup>+</sup> cells (d; tumor associated macrophages), CD8<sup>+</sup> TCF7<sup>+</sup> T cells (e), and cytokine production in CD8<sup>+</sup> T cells (f).
