# Supplementary material for: Meningeal lymphatics regulate radiotherapy efficacy through modulating anti-tumor immunity
Source: Cell Res. 2022 Mar 17;32(6):543–54. doi: 10.1038/s41422-022-00639-5 (PMC9159979; doi:10.1038/s41422-022-00639-5)
Supplement: Supplementary file 11 — Supplementary information, Fig. S11 [file 41422_2022_639_MOESM11_ESM.pdf]

# Supplementary information, Figure S11

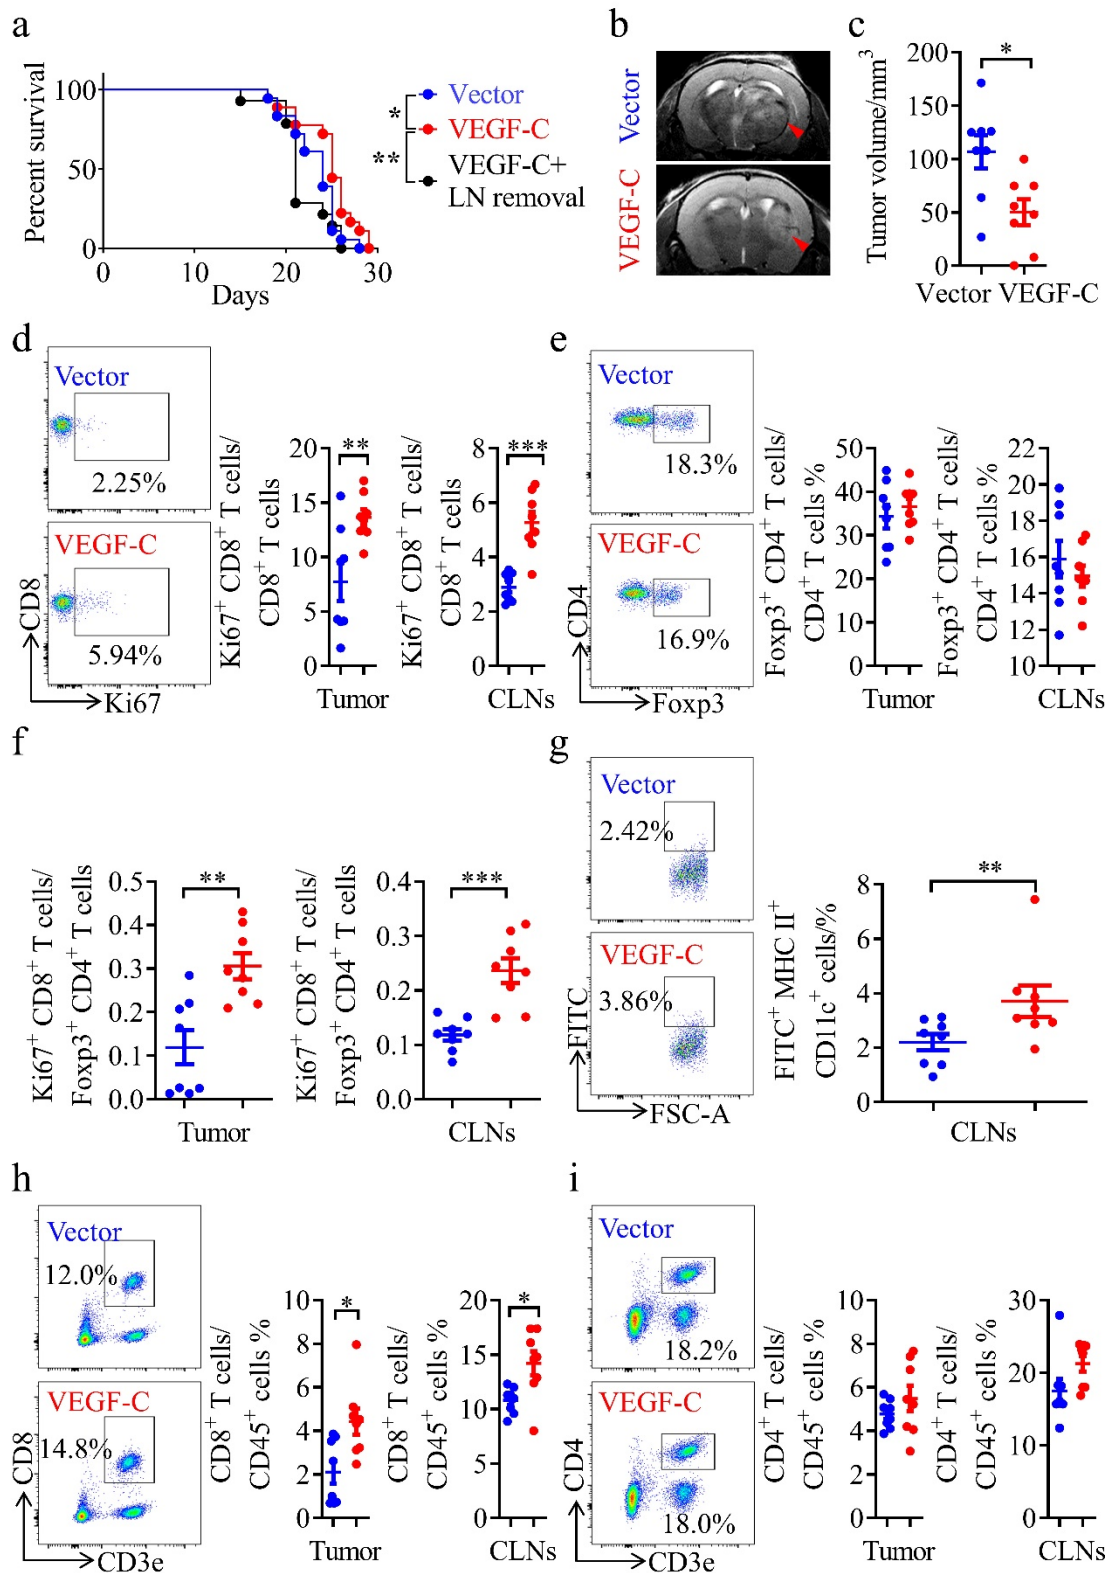

**Supplementary information, Figure S11. Tumor-derived VEGF-C improves the therapeutic effect of RT in a model of metastatic lung cancer.** a, Survival of mice with striatal Vector-LLC or VEGF-C-LLC tumor injection treated with RT (Vector, n =

18; VEGF-C, n = 18; VEGF-C + LN removal, n = 14). b, Representative T2-weighted single brain slices from mice with striatal Vector-LLC or VEGF-C-LLC tumor injection treated with RT (triangles indicate tumors). c, Tumor volume in mice with striatal Vector-LLC or VEGF-C-LLC tumor injection treated with RT (n = 8). d–e, Representative flow cytometry plots of CD8<sup>+</sup> Ki67<sup>+</sup> T cells as percentages of overall CD8<sup>+</sup> T cells (d), and CD4<sup>+</sup> Foxp3<sup>+</sup> T cells as percentages of overall CD4<sup>+</sup> T cells (e) in CLNs (left) and quantification (right) in tumors and CLNs from mice with striatal Vector-LLC or VEGF-C-LLC tumor injection treated with RT on day 14 after inoculation (n = 8). f, Ratios of CD8<sup>+</sup> Ki67<sup>+</sup> T cells to CD4<sup>+</sup> Foxp3<sup>+</sup> T cells in tumors and CLNs from mice with striatal Vector-LLC or VEGF-C-LLC tumor injection treated with RT (n = 8). g, Left panel, representative flow cytometry dot plots of DC trafficking from LLC tumors to CLNs of mice with striatal Vector-LLC or VEGF-C-LLC tumor injection treated with RT by the quantity of FITC<sup>+</sup> DCs in the CLNs 24 h after intratumoral injection of FITC-labeled latex beads. Right panel, quantification of Bead<sup>+</sup> DCs in the CLNs of mice with striatal Vector-LLC or VEGF-C-LLC tumor injection treated with RT (n = 8). h–i, Representative flow cytometry plots of CD8<sup>+</sup> T cells (h), and CD4<sup>+</sup> T cells (i) in CLNs (left) and quantification (right) in tumors and CLNs from mice with striatal Vector-LLC or VEGF-C-LLC tumor injection treated with RT as percentages of overall CD45<sup>+</sup> cells on day 14 after inoculation (n = 8). Data are presented as means ± SEM. \*P < 0.05, \*\*P < 0.01, \*\*\*P < 0.001; log-rank (Mantel–Cox) test (a); Student's t test (c–i). Data are from at least three (a, d–i) or two (b, c) independent experiments.
